# Supplementary material for: Constructing a Carbon-Encapsulated Carbon Composite Material with Hierarchically Porous Architectures for Efficient Capacitive Storage in Organic Supercapacitors
Source: MDPI journal article supplement (doi:10.3390/ijms23126774), 2022-06-17
Supplement: s1 [file s1]

## Supplementary Information

### **Constructing a Carbon-Encapsulated Carbon Composite Material with Hierarchically Porous Architectures for Efficient Capacitive Storage in Organic Supercapacitors**

Rene Mary Amirtha <sup>1,†</sup>, Hao-Huan Hsu <sup>1,†</sup>, Mohamed M. Abdelaal <sup>1,2</sup>, Ammaiyappan Anbunathan <sup>1</sup>, Saad G. Mohamed <sup>2</sup>, Chun-Chen Yang <sup>1,3,4</sup> and Tai-Feng Hung <sup>1,\*</sup>

<sup>1</sup>Battery Research Center of Green Energy, Ming Chi University of Technology, 84 Gungjuan Rd., Taishan District, New Taipei City 24301, Taiwan

<sup>2</sup>Tabbin Institute for Metallurgical Studies (TIMS), Tabbin, Helwan 109, Cairo 11421, Egypt

<sup>3</sup>Department of Chemical Engineering, Ming Chi University of Technology, 84 Gungjuan Rd., Taishan District, New Taipei City 24301, Taiwan

<sup>4</sup>Department of Chemical and Materials Engineering, Chang Gung University, 259 Wenhua 1st Rd., Guishan District, Taoyuan 33302, Taiwan

<sup>†</sup>These authors contributed equally to this work

\* Corresponding author.

*E-mail addresses:* taifeng@mail.mcut.edu.tw (T.F. Hung)

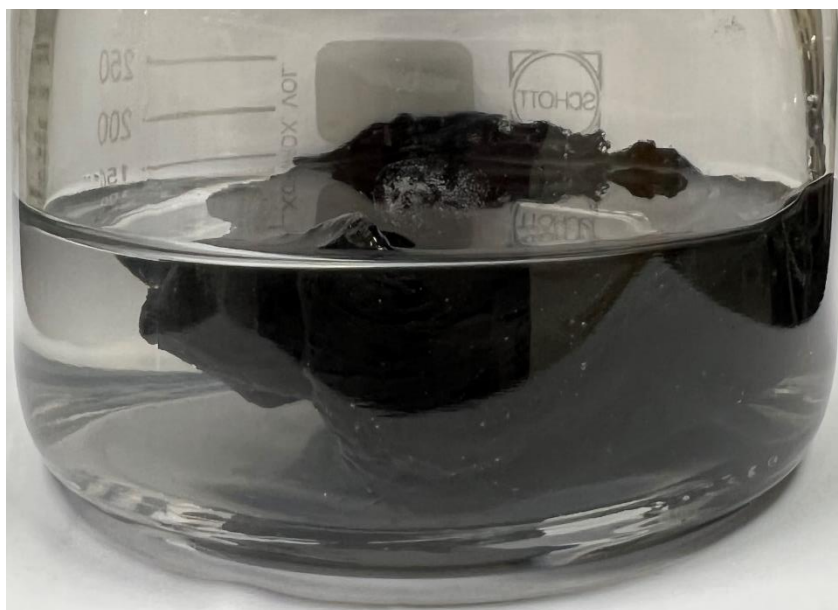

**Figure S1.** Digital image of PVP/H-HPAC composite hydrogel.

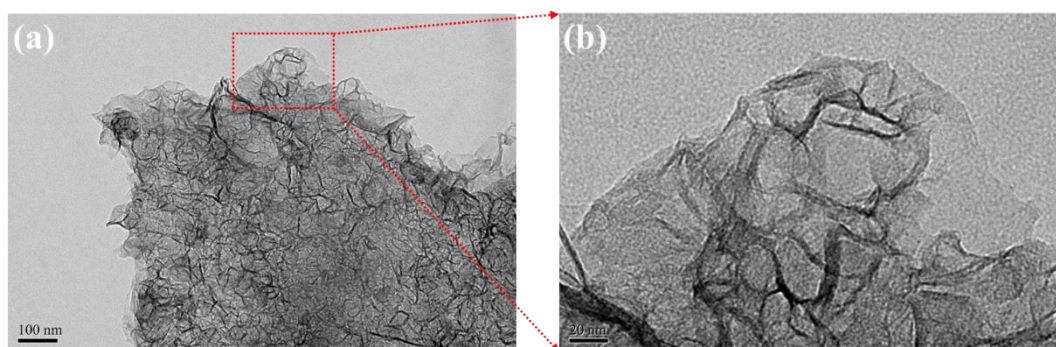

**Figure S2.** Low-magnification TEM micrographs of H@H composite material with the scale bar of (a) 100 nm and (b) 20 nm, respectively.

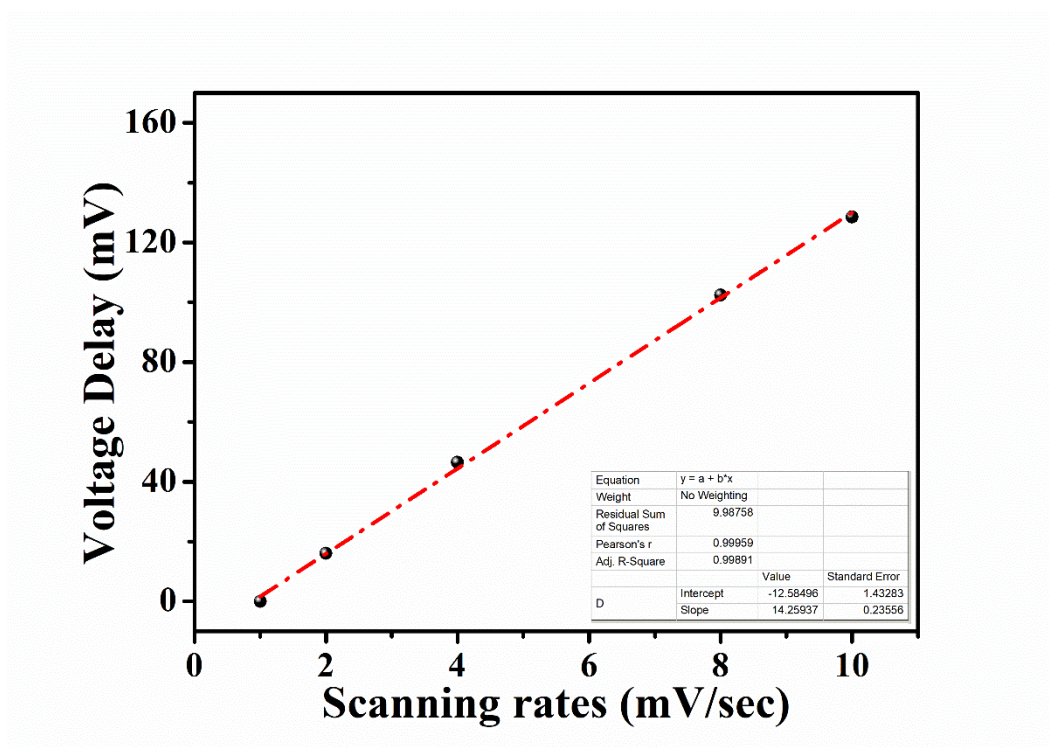

**Figure S3.** Dependence of the voltage delay ( $\Delta V$ ) on the scanning rates, in which the  $\Delta V$  values were acquired from cyclic voltammograms plotted in Figure 6 (a).

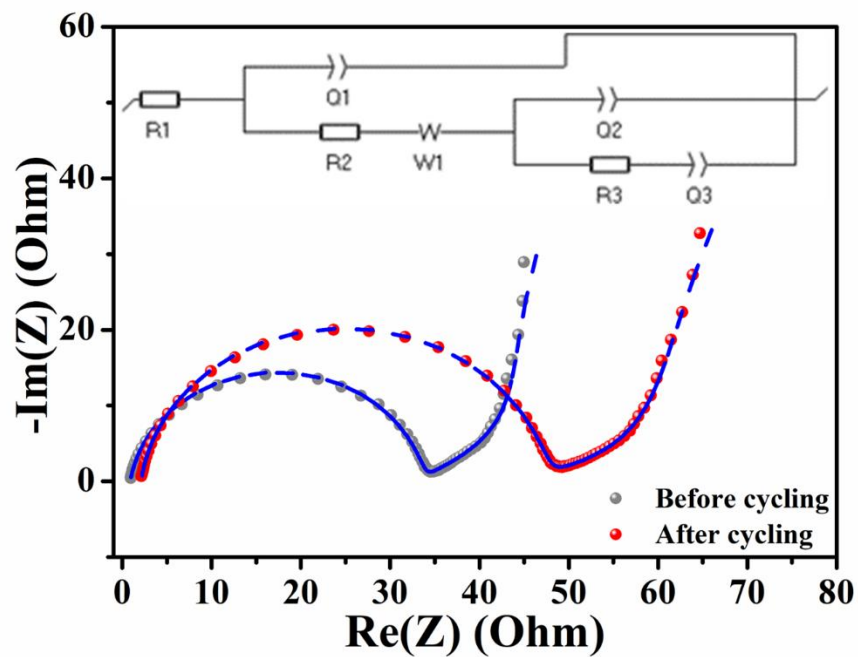

**Figure S4.** The electrochemical impedance spectra of the H@H electrode recording before and after the cycling test, while the inset shows the equivalent circuit model used for the parameter fitting.

**Table S1.** Comparison of electrochemical performances of H-HPAC and reported HPAC in symmetric supercapacitors using 1 M TEABF<sub>4</sub>/PC electrolyte.

| Heteroatoms                    | $S_{\text{BET}}$<br>(m <sup>2</sup> /g) | Mass loading<br>(mg/cm <sup>2</sup> ) | Voltage<br>(V) | Specific capacitance<br>(F/g)                             | Capacitance retention<br>(%)    | References <sup>¶</sup> |
|--------------------------------|-----------------------------------------|---------------------------------------|----------------|-----------------------------------------------------------|---------------------------------|-------------------------|
| N (0.23 wt.%)<br>O (4.7 wt.%)  | 2012                                    | 5.1                                   | 0 ~ 2.7        | 118 at 1 mA/cm <sup>2</sup> , 78 at 10 mA/cm <sup>2</sup> | 76 at 10,000 at 5 mA            | 9                       |
| O (~9 at. %)                   | 1899                                    | ~0.8                                  | 0 ~ 2.7        | 134 at 0.5 A/g, 96 at 10 A/g                              | 81 at 10,000 cycles at 2 A/g    | 15                      |
| N (4 at. %)<br>O (15.5 at. %)  | 1358                                    | 1.2                                   | 0 ~ 2.5        | 21 at 0.1 A/g, 11.5 at 5 A/g                              | 92 at 5,000 cycles at 0.5 A/g   | 37                      |
| N (1.3 wt.%)<br>O (12 wt.%)    | 2125                                    | NA <sup>†</sup>                       | 0 ~ 2.5        | 139 at 0.25 A/g, 90 at 10 A/g                             | NA                              | 38                      |
| N (~10.8 wt.%)                 | 1519                                    | ~1.0                                  | 0 ~ 3.0        | 162 at 0.5 A/g, 103 at 10 A/g                             | ~93 at 10,000 cycles at 2 A/g   | 39                      |
| S (NA)                         | 2554                                    | NA                                    | 0 ~ 2.7        | 173 at 0.05 A/g, 115 at 10 A/g                            | NA                              | 40                      |
| O (NA)                         | 1594 <sup>‡</sup>                       | NA                                    | 0 ~ 2.5        | 88 at 0.5 A/g, 52 at 10 A/g                               | 91 at 3,000 cycles at 5 A/g     | 41                      |
| N (1.1 wt. %)<br>O (4.6 wt. %) | 2626                                    | 8.2                                   | 0 ~ 3.0        | 140 at 0.05 A/g, 92 at 10 A/g                             | ~82 at 10,000 cycles at 2.5 A/g | 42                      |
| N (0.67 wt.%)                  | 2566                                    | 3.5                                   | 0 ~ 2.7        | 147 at 0.05 A/g, 117 at 10 A/g                            | 81 at 10,000 cycles at 5 A/g    | 43                      |
| N (0.58 wt.%)<br>O (4.5 wt.%)  | 1316                                    | 7.5                                   | 0 ~ 2.7        | 119 at 1 mA/cm <sup>2</sup> , 74 at 10 mA/cm <sup>2</sup> | 77 at 30,000 at 5 mA            | This work               |

<sup>†</sup>Not available, <sup>‡</sup>Based on QSDFT calculation, <sup>¶</sup>Same as those cited in Figure 7 (d).
